## Sodium-glucose co-transporter-2 inhibitors improve cardiovascular outcomes in heart failure with reduced ejection fraction regardless of ischemic etiology

D. Patoulas<sup>1</sup>, A. Boulmpou<sup>2</sup>, C. Tsavouoglou<sup>2</sup>, M. Toumpourleka<sup>2</sup>, F. Siskos<sup>1</sup>, A. Nikolaidis<sup>1</sup>, C.E. Papadopoulos<sup>2</sup>, V. Vassilikos<sup>2</sup>, M. Doulmas<sup>1</sup>

<sup>1</sup>Hippokraton General Hospital of Thessaloniki, Second Propedeutic Department of Internal Medicine, Thessaloniki, Greece; <sup>2</sup>Hippokraton General Hospital of Thessaloniki, Third Department of Cardiology, Thessaloniki, Greece

**Funding Acknowledgement:** Type of funding sources: None.

**Background:** Coronary artery disease remains the main underlying cause of heart failure (HF), despite the progress in prevention, diagnosis and treatment. Sodium-glucose co-transporter-2 inhibitors have been shown to improve surrogate cardiovascular outcomes in patients with HF with reduced ejection fraction (HFrEF), regardless of diabetes status.

**Purpose:** We sought to determine the effect of SGLT-2 inhibitors on the primary composite endpoint (cardiovascular death or hospitalization for HF) across the two hallmark trials in the HFrEF population (EMPEROR Reduced and DAPA-HF), according to ischemic or non-ischemic etiology of HF.

**Methods:** We pooled data from EMPEROR reduced and DAPA-HF trials in a total of 8,474 patients with HFrEF, performing a sub-analysis accord-

ing to the presence of ischemic cardiomyopathy as the underlying cause of HFrEF.

**Results:** Treatment with SGLT-2 inhibitors resulted in a significant decrease in the risk for the primary composite outcome in patients with HFrEF of ischemic etiology, equal to 18% (RR=0.82, 95% CI: 0.73–0.92, I<sup>2</sup>=0%). In patients with HFrEF of non-ischemic etiology, SGLT-2 inhibitors produced a significant decrease in the risk for the primary composite outcome equal to 18% (RR=0.72, 95% CI: 0.63–0.82, I<sup>2</sup>=0%). Despite the greater effect in patients with non-ischemic HFrEF, no subgroup difference was detected (p=0.16). Generated results are summarized in Figure 1.

**Conclusions:** SGLT-2 inhibitors improve surrogate cardiovascular outcomes both in patients with ischemic and non-ischemic HFrEF.

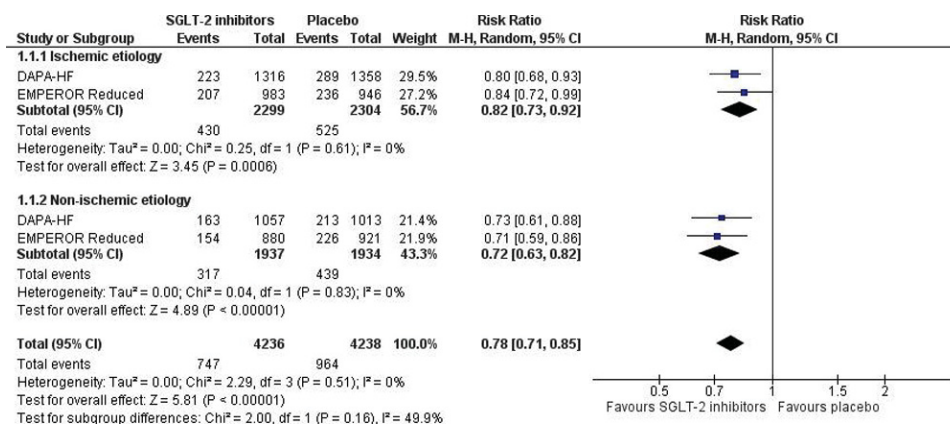

Figure 1
